# Supplementary material for: Computational investigation of CO2 electroreduction on tin oxide and predictions of Ti, V, Nb and Zr dopants for improved catalysis
Source: Royal Society of Chemistry journal article supplement (doi:10.1039/c7ta00405b), 2017-01-01
Supplement: c7ta00405b1.pdf [file c7ta00405b1.pdf]

# Supporting information for Computational investigation of CO<sub>2</sub> electroreduction on tin oxide and predictions of Ti, V, Nb and Zr dopants for improved catalysis

Karthikeyan Saravanan, Yasemin Basdogan, James Dean, and John A. Keith

February 26, 2017

## 1 Details of benchmark calculations

We used both  $\Gamma$ -point and  $k$ -point sampling in CP2K to benchmark bulk and surface properties. All  $\Gamma$ -point calculations on bulk structures required sufficiently large unit cells in order to get converged properties. The cohesive energy of  $\alpha$ -Sn and SnO<sub>2</sub> reported in Table 1 calculated with  $\Gamma$ -point sampling consisted of 64 Sn atoms and 128 SnO<sub>2</sub> formula units, respectively. For bulk data with  $k$ -points, we used 8 Sn atoms and 2 SnO<sub>2</sub> formula units per unit cell of Sn and SnO<sub>2</sub> and  $8 \times 8 \times 8$   $k$ -points for the calculations, respectively. Surface properties of Sn and SnO<sub>2</sub> calculated with  $\Gamma$ -point involved a Sn (100) surface (repeated  $4 \times 2$  along  $x \times y$  direction) and SnO<sub>2</sub> (110) surface (repeated  $2 \times 2$  along  $x \times y$  direction). For surface data with  $k$ -points, we use the same surface unit cells and  $4 \times 4 \times 1$   $k$ -points. For bulk properties calculated by VASP, we used a 8 atom Sn unit cell and a 2 formula unit cell SnO<sub>2</sub>. Surface unit cells, repeated  $1 \times 1$  along  $x \times y$  direction, of Sn and SnO<sub>2</sub> were used to calculate all the surface properties. A energy cutoff of 700 eV (Sn) and 500 eV (SnO<sub>2</sub>) and  $5 \times 5 \times 5$  Monkhorst-pack  $k$ -points was required to obtain converged properties in VASP.

Table 1: Surface lattice constants of slabs with and without oxygen defects

| Surface            | a / Å | b / Å | c / Å |
|--------------------|-------|-------|-------|
| Clean slab         | 13.61 | 6.46  | 40.00 |
| Clean slab + 1 def | 13.62 | 6.63  | 40.00 |
| Clean slab + 2 def | 13.57 | 6.69  | 40.00 |

## 2 Relative binding energy on all dopant elements

Table 2: Relative binding energy of H between 3H/1CO<sub>2</sub> and 4H/1CO<sub>2</sub> states for all the dopant elements

| Dopant | $\Delta G(H^*)$ | Overpotential (V) |
|--------|-----------------|-------------------|
| Sn     | 0.69            | -0.60             |
| Ti     | 0.15            | -0.06             |
| V      | -0.02           | -0.11             |
| Zr     | 0.49            | -0.40             |
| Co     | 0.99            | -0.90             |
| Pb     | -0.48           | -0.57             |
| Zn     | 0.62            | -0.52             |
| Cd     | 0.17            | -0.08             |
| Nb     | -0.42           | -0.51             |
| Sb     | 1.40            | -1.30             |
| Ta     | 0.84            | -0.74             |

## 3 Role of solvation

We investigated the role of solvation using a different continuum solvation model, VASPSol, which is implemented in VASP. Single point energy calculations using PAW potential, PBE functional on optimized structures from CP2K were performed. The table below shows that the binding energy of the most relevant intermediates, the 3H/1CO<sub>2</sub> and 4H/1CO<sub>2</sub> states. The data below shows that solvation does not significantly affect the relative energetics of these two key intermediates.

Table 3: Relative energetics calculated with and without solvation

| Energy                                                      | without solvation / eV | with solvation / eV |
|-------------------------------------------------------------|------------------------|---------------------|
| Binding energy of CO <sub>2</sub> to clean slab + 3H + 1def | 0.33                   | 0.41                |
| Binding energy of CO <sub>2</sub> to clean slab + 4H + 1def | 0.25                   | 0.39                |
| Relative stability between Fig 4.a and 4.b                  | 0.09                   | 0.08                |

## 4 Energetics

Table 4: Table of energies of SnO<sub>2</sub> surface with 0% defects and different concentration of adsorbates. (I) Energy of structures relaxed with  $k$ -point sampling , (II) Energy from a single energy calculation on a structure relaxed with no  $k$ -point sampling. x denotes geometries that did not converge with  $k$ -point sampling

| Surface composition     | E <sub>elec</sub> (I) / eV | E <sub>elec</sub> (II) / eV | ZPE  | -TS   |
|-------------------------|----------------------------|-----------------------------|------|-------|
| Clean slab              | -30975.32                  |                             |      |       |
| + 1H                    | -30992.59                  | -30992.51                   | 0.30 | -0.01 |
| + 2H                    | -31009.38                  | -31009.33                   | 0.60 | -0.02 |
| + 1CO <sub>2</sub>      | -32003.14                  | -32003.09                   | 0.41 | -0.08 |
| + 2CO <sub>2</sub>      | -33031.05                  | -33030.88                   | 0.84 | -0.11 |
| + 1H + 1CO <sub>2</sub> | -32019.79                  | -32019.74                   | 0.77 | -0.06 |
| + 2H + 1CO <sub>2</sub> | -32037.72                  | -32037.54                   | 1.04 | -0.08 |
| + 1H + 2CO <sub>2</sub> | -33048.30                  | -33048.20                   | 1.14 | -0.13 |
| + 2H + 2CO <sub>2</sub> | -33065.29                  | -33065.23                   | 1.44 | -0.14 |
| + 3H                    | x                          | -31026.38                   | 0.91 | -0.03 |
| + 3H + 1CO <sub>2</sub> | x                          | -32054.34                   | 1.34 | -0.08 |
| + 3H + 2CO <sub>2</sub> | x                          | -33081.24                   | 1.83 | -0.14 |
| + 4H                    | -31043.18                  | -31043.14                   | 1.23 | -0.03 |
| + 4H + 1CO <sub>2</sub> | x                          | -32070.54                   | 1.69 | -0.09 |
| + 4H + 2CO <sub>2</sub> | x                          | -33097.86                   | 2.16 | -0.13 |
| + 5H                    | x                          | -31058.41                   | 1.54 | -0.04 |
| + 5H + 1CO <sub>2</sub> | x                          | -32086.13                   | 1.97 | -0.09 |
| + 5H + 2CO <sub>2</sub> | -33113.48                  | -33113.49                   | 2.45 | -0.14 |

Table 5: Table of energies of SnO<sub>2</sub> surface with 25% defects and different concentration of adsorbates. (I) Energy of structures relaxed with  $k$ -point sampling , (II) Energy from a single energy calculation on a structure relaxed with no  $k$ -point sampling.

| Surface composition     | E <sub>elec</sub> (I) / eV | E <sub>elec</sub> (II) / eV | ZPE  | -TS   |
|-------------------------|----------------------------|-----------------------------|------|-------|
| Clean slab + 1def       | -30538.93                  | -30538.78                   |      |       |
| + 1H                    | -30556.21                  | -30556.07                   | 0.29 | -0.02 |
| + 2H                    | -30574.41                  | -30574.19                   | 0.61 | -0.02 |
| + 1CO <sub>2</sub>      | -31566.90                  | -31566.76                   | 0.43 | -0.05 |
| + 2CO <sub>2</sub>      | -32594.51                  | -32594.32                   | 0.86 | -0.11 |
| + 1H + 1CO <sub>2</sub> | -31584.05                  | -31583.88                   | 0.75 | -0.06 |
| + 2H + 1CO <sub>2</sub> | -31601.77                  | -31601.70                   | 1.03 | -0.08 |
| + 1H + 2CO <sub>2</sub> | -32611.55                  | -32611.42                   | 1.12 | -0.16 |
| + 2H + 2CO <sub>2</sub> | -32628.86                  | -32628.66                   | 1.49 | -0.13 |
| + 3H                    | -30590.92                  | -30590.85                   | 0.91 | -0.03 |
| + 3H + 1CO <sub>2</sub> | -31618.39                  | -31618.31                   | 1.32 | -0.09 |
| + 3H + 2CO <sub>2</sub> | -32645.74                  | -32645.66                   | 1.78 | -0.15 |
| + 4H                    | -30607.55                  | -30606.21                   | 1.21 | -0.04 |
| + 4H + 1CO <sub>2</sub> | -31633.80                  | -31633.68                   | 1.65 | -0.09 |
| + 4H + 2CO <sub>2</sub> | -32661.27                  | -32661.16                   | 2.07 | -0.13 |

Table 6: Table of energies of SnO<sub>2</sub> surface with 50% defects and different concentration of adsorbates. (I) Energy of structures relaxed with  $k$ -point sampling , (II) Energy from a single energy calculation on a structure relaxed with no  $k$ -point sampling. x denotes geometries that did not converge with  $k$ -point sampling

| Surface composition     | E <sub>elec</sub> (I) / eV | E <sub>elec</sub> (II) / eV | ZPE  | -TS   |
|-------------------------|----------------------------|-----------------------------|------|-------|
| Clean slab + 2def       | -30102.37                  | -30102.22                   |      |       |
| + 1H                    | x                          | -30119.08                   | 0.30 | -0.01 |
| + 2H                    | x                          | -30135.63                   | 0.61 | -0.02 |
| + 1CO <sub>2</sub>      | -31129.88                  | -31129.66                   | 0.42 | -0.06 |
| + 2CO <sub>2</sub>      | -32157.61                  | -32157.52                   | 0.87 | -0.10 |
| + 1H + 1CO <sub>2</sub> | -31146.20                  | -31146.12                   | 0.71 | -0.08 |
| + 2H + 1CO <sub>2</sub> | -31162.98                  | -31162.85                   | 1.04 | -0.07 |
| + 1H + 2CO <sub>2</sub> | -32173.27                  | -32173.09                   | 1.19 | -0.11 |
| + 2H + 2CO <sub>2</sub> | -32191.10                  | -32190.53                   | 1.48 | -0.13 |
| + 3H                    | -30152.50                  | -30150.86                   | 0.92 | -0.03 |
| + 3H + 1CO <sub>2</sub> | x                          | -31178.60                   | 1.33 | -0.09 |
| + 3H + 2CO <sub>2</sub> | x                          | -32206.70                   | 1.77 | -0.15 |
